# Supplementary material for: Determination of reducing sugars in foodstuff applying multivariate second-order calibration
Source: Royal Society of Chemistry journal article supplement (doi:10.1039/c6ay00964f), 2016-01-01
Supplement: c6ay00964f1.pdf [file c6ay00964f1.pdf]

**Figure 1s.** Absorption spectra of a standard solution of potassium ferricyanide HCF  $60 \text{ mg.L}^{-1}$  (—) and potassium ferrocyanide (---)

**Figure 2s.** Absorbance-time matrices for A glucose, B fructose and C lactose., for concentration of  $30.0 \text{ mg L}^{-1}$  each sugar.
