# Supplementary material for: Determination of reducing sugars in foodstuff applying multivariate second-order calibration
Source: Royal Society of Chemistry journal article supplement (doi:10.1039/c6ay00964f), 2016-01-01
Supplement: c6ay00964f2.pdf [file c6ay00964f2.pdf]

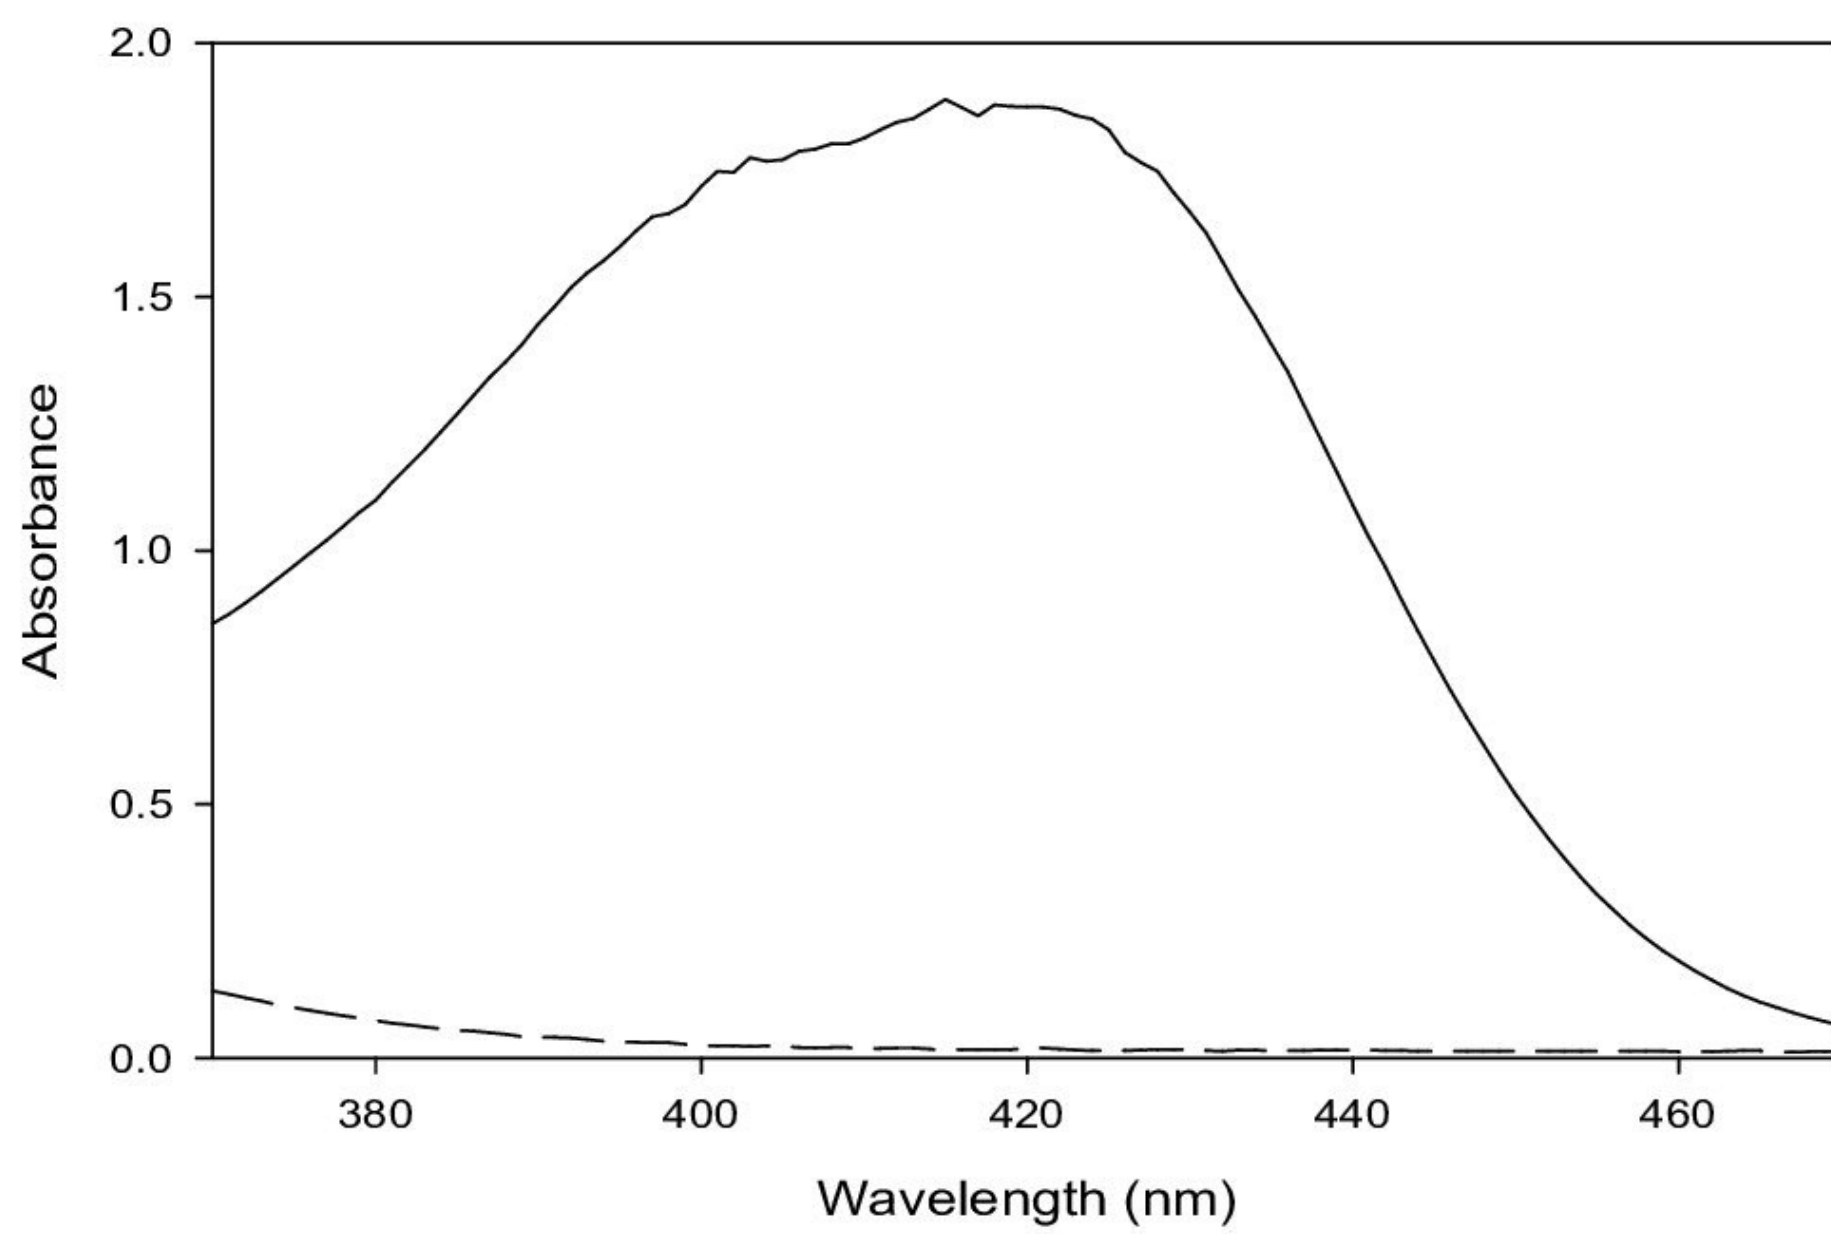

Figure 1s. Absorption spectra of a standard solution of potassium ferricyanide HCF  $0,60 \text{ g L}^{-1}$  (—) and potassium ferrocyanide (---)
