# Supplementary material for: Determination of reducing sugars in foodstuff applying multivariate second-order calibration
Source: Royal Society of Chemistry journal article supplement (doi:10.1039/c6ay00964f), 2016-01-01
Supplement: c6ay00964f3.pdf [file c6ay00964f3.pdf]

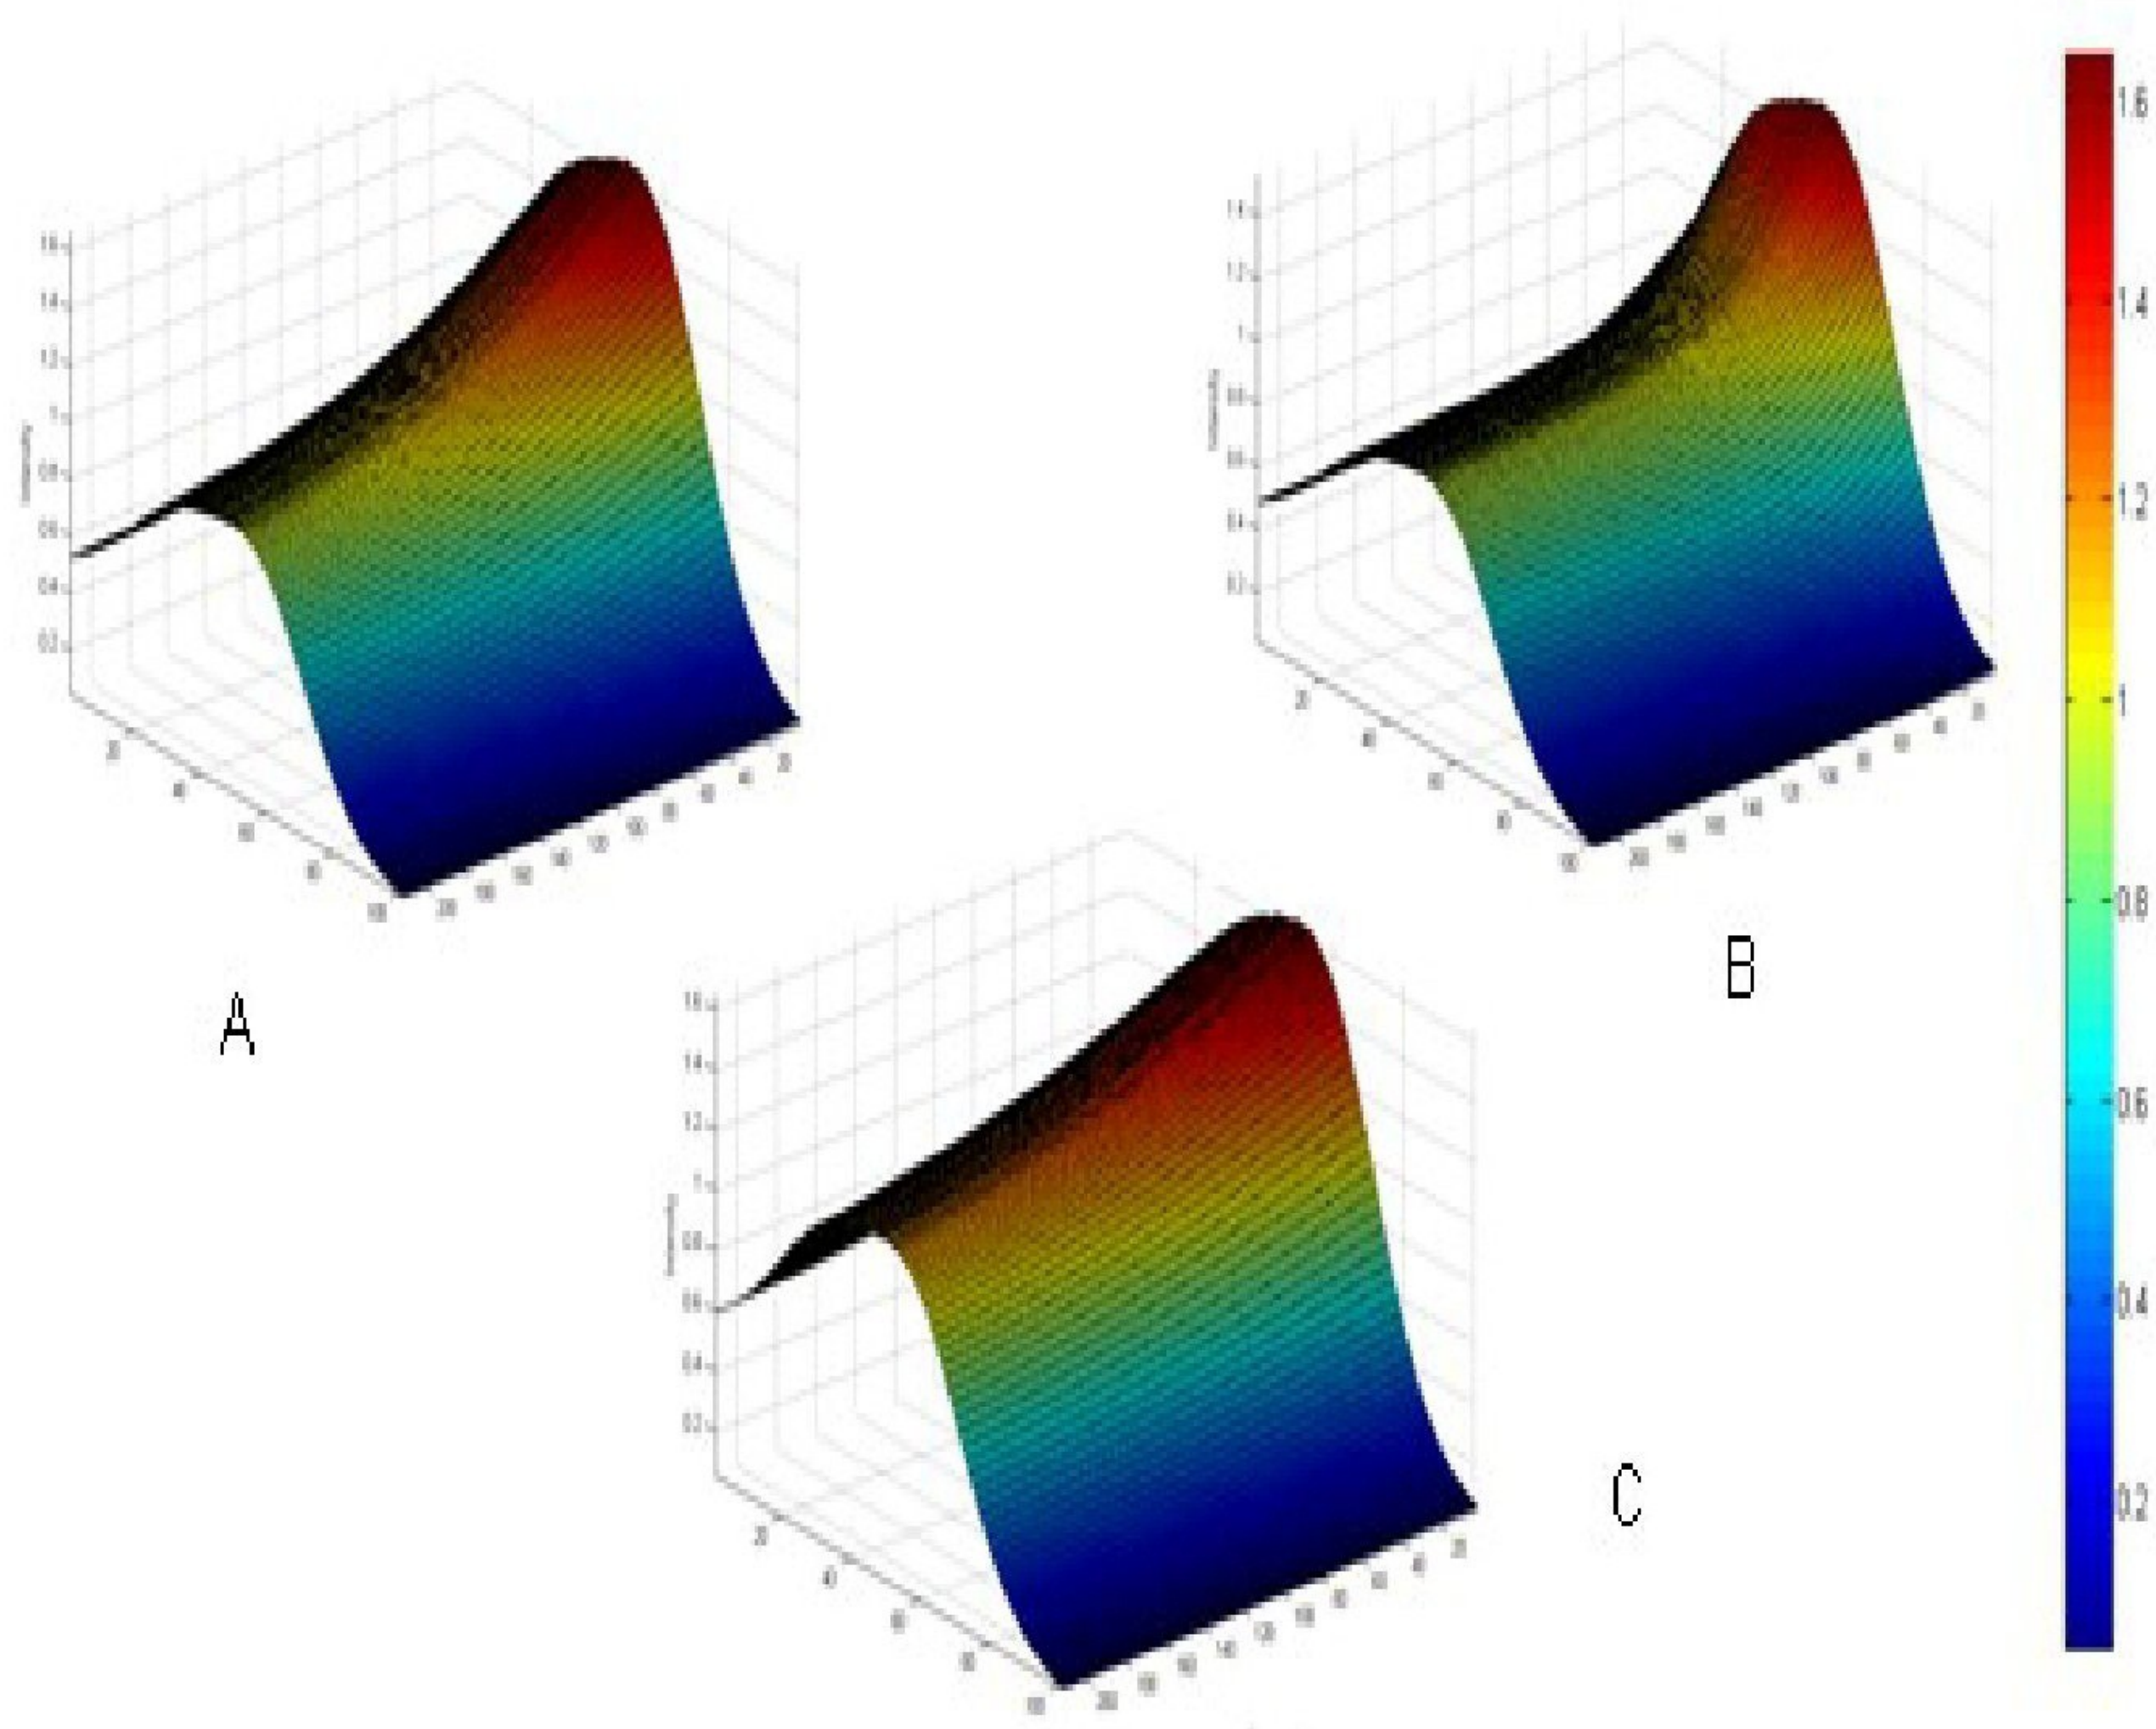

**Figure 2s.** Absorbance-time matrices for A : glucose, B: fructose and C: lactose, for concentration of : 30.0 mg L<sup>-1</sup> each sugar.
