# Supplementary material for: Determination of reducing sugars in foodstuff applying multivariate second-order calibration
Source: Royal Society of Chemistry journal article supplement (doi:10.1039/c6ay00964f), 2016-01-01
Supplement: c6ay00964f4.pdf [file c6ay00964f4.pdf]

# 1 SUPPLEMENTARY MATERIAL

## 2 *Theory*

### 3 *MCR-ALS*

4 Multivariate curve-resolution (MCR) coupled to alternating least-squares (ALS) is capable of  
5 handling data matrices with varying component profiles in one of the data dimensions. It can be  
6 thought that this makes it especially suitable for the convenient processing of kinetic-  
7 spectrophotometric matrix data; typically many examples of successful application of MCR-ALS for  
8 resolving this kind of matrix data have been published in scientific literature.<sup>1-3</sup>

9 In MCR-ALS, an augmented data matrix is created from a group of data matrices for several  
10 samples. We consider matrices of size  $J \times K$ , where  $J$  is the number of data points in the spectral  
11 dimension it means the number of wavelengths and  $K$  is the number of data points in the kinetic or  
12 temporal dimension it means the number of reaction times. This mathematical resource allows this  
13 algorithm to resolve linear dependence data. The augmented matrix could be constructed assembling  
14 data matrices following columns direction, rows direction or both directions simultaneously. In general,  
15 augmentation can be performed in either direction, depending on the type of experiment being  
16 analyzed.

17 However, usually the matrices are augmented in the mode suspected to lose the linearity. In the  
18 present case, the mode of augmentation should be the spectral one, since identical data profiles were  
19 obtained in spectral dimension correspond to unreacted HCF. An augmented matrix  $\mathbf{D}$  of size  $J(I+1) \times$   
20  $K$  was developed by joining calibration matrices  $\mathbf{X}_{c,i}$  and the unknown matrix  $\mathbf{X}_u$ .<sup>4,5</sup>

21 Therefore, the bilinear decomposition of the augmented matrix  $\mathbf{D}$  was performed according to  
22 the expression:

$$23 \quad \mathbf{D} = \mathbf{S}_{\text{aug}} \mathbf{G}^T + \mathbf{E} \quad (1)$$

where the rows of **D** contain the spectra measured for different samples at several values of the temporal dimension, **S<sub>aug</sub>** contains spectra for intervenient species, **G** contains the temporal or kinetic profiles and **E** is a matrix of residual not fitted by the model. The property dimensions for **D**, **S**, **G** and **E** are  $(I + 1)J \times K$ ,  $(I+1)J \times N$ ,  $K \times N$ , and  $(I + 1)J \times K$  respectively ( being *I* the number of calibration matrices , *J* the number of wavelengths , *K* number of temporal data and *N* is the number of responsive components). As can be seen, **D** contains data for the *I* different samples.

The iterative ALS procedure aims at minimizing the Frobenius norm of  $\| \mathbf{E} \|$ , and was initialized using an initial estimation of the kinetic profiles of pure components used for calculating  $\hat{\mathbf{S}}$  ( $\hat{\mathbf{S}}$  means the estimation of **S**) as :

$$\hat{\mathbf{S}} = \mathbf{D} \mathbf{G}^T{}^+ \quad (2)$$

where '+' means the pseudoinverse of the matrix  $\mathbf{G}^T = [\mathbf{G}(\mathbf{G}_T \mathbf{G})^{-1}]$ .

Using the matrix  $\hat{\mathbf{S}}$  ( equation 2) and the original matrix **D**, the matrix **G** was re-estimated by least squares as :

$$\hat{\mathbf{G}} = (\hat{\mathbf{S}}^+ \mathbf{D})^T \quad (3)$$

The generalized inverse of **G** can be obtained only if the kinetic profiles of the sample components are different, as in the present case. The generalized inverse of **S** could be obtained because the matrix augmentation broke the linear dependence of the individual spectral profiles.

Finally, **E** was calculated applying equation (1) using matrix **D** and the estimation of **G** and  $\hat{\mathbf{G}}$ . These steps could be implemented in an alternating least squares cycles , so that in each iteration new **S** and **G** matrices were obtained. During the iterative recalculation of **S** and **G** a series of constraints were applied to improve these solutions, to give them a physical meaning and to limit their possible number for the same data fitting, such as 1) non-negativity for spectral and kinetic profiles, 2) stoichiometric relations among different chemical species in equilibrium or in kinetics. Iterations

47 continued until an optimal solution was obtained that fulfills the postulated constraints and the  
48 established convergence criteria.

49 After MCR-ALS decomposition of matrix **D**, concentration information contained in **S** can be  
50 used for quantitative predictions, by first defining the analyte concentration score as the area under the  
51 profile for the *i*th. sample.

52 Calibration samples are always within those employed to build the augmented matrix **D**. Their  
53 associated scores can be used to build a pseudo-univariate calibration graph against the nominal analyte  
54 concentrations. Prediction of analyte concentration in unknowns then proceeds by interpolation of the  
55 corresponding analyte scores in the calibration graph .<sup>4</sup>

56

#### 57 ***U-PLS***

58 Unfolded partial least squares (U-PLS) operates in a similar way to partial least squares-1 (PLS-  
59 1), except that second-order data are first vectorized or unfolded along one of the data dimensions, and  
60 then a conventional partial least-squares (PLS) model is built using these unfolded data and the  
61 nominal analyte concentrations. <sup>6,7</sup>

62 The **I** calibration data matrices are first vectorized into  $JK \times 1$  vectors, and then a usual PLS  
63 model is built using these data together with the vector of calibration concentrations **y** (size  $I \times 1$ ). This  
64 provides a set of loadings **P** and weight loadings **W** (both of size  $JK \times A$ , where *A* is the number of  
65 latent factors), as well as regression coefficients **v** (size  $A \times 1$ )  
66 The parameter *A* can be selected by techniques such as leave-one-out cross-validation .<sup>8</sup>

67 Notice that PLS is a latent variable method, and hence no prior information as to the spectral or  
68 time evolution of the analyte are in principle required for its successful operation.

69 If no unexpected components are present in the test sample, **v** could be used to estimate the  
70 analyte concentration according to

$$y_u = \mathbf{t}_u^T \mathbf{v} \quad (4)$$

where  $\mathbf{t}_u$  is the test sample score, obtained by projecting the vectorized data for the test sample  $\text{vec}(\mathbf{X}_u)$  onto the space of the A latent factors:

$$\mathbf{t}_u = (\mathbf{W}^T \mathbf{P})^{-1} \mathbf{W}^T \text{vec}(\mathbf{X}_u) \quad (5)$$

where  $\text{vec}(\cdot)$  implies the vectorization operator.

76

## 77 *N-PLS*

Multiway regression methods such as N-PLS extend the tradicional PLS algorithm to higher orders, using the multidimensional structure of the data for model building and prediction .<sup>6</sup>

The tridimensional matrix  $\mathbf{X}$  ( $I \times J \times K$ ) is decomposed in a series of triads. In the case of three-way data, the model is given by the following equation:

$$x_{ijk} = \sum_{f=1}^N t_i w_j^f w_k^f + e_{ijk} \quad (6)$$

where  $x_{ijk}$  is the variation of absorbance intensity for sample  $i$  at wavelength  $j$  and time  $k$ ,  $N$  is the number of components,  $t$  is an element of the score matrix  $\mathbf{T}$  and, two  $w$  are elements of the two loading matrices  $\mathbf{W}$ , one in spectral dimension  $\mathbf{w}^J$  ( $J \times 1$ ) and the other for temporal dimension  $\mathbf{w}^K$  ( $K \times 1$ ), and  $e_{ijk}$  is a residue not fitted by the model. The model finds the scores yielding maximum covariance with analyte concentrations as the dependent variable. The advantage of using N-PLS over bidimensional regression is a stabilization of the decomposition involved in Eq. (6), which potentially gives increased interpretability and better predictions

The algorithm used the data matrix of the I calibration samples within the concentration vector  $\mathbf{Y}$  ( $I \times 1$ ) for obtaining loading and the regression coefficient  $\mathbf{v}$  (size  $A \times 1$ ). As U-PLS, if no unexpected

92 components are present in the test sample,  $\mathbf{v}$  could be used to estimate the analyte concentration  
 93 according to

$$94 \quad y_u = \mathbf{t}_u^T \mathbf{v} \quad (7)$$

95 Cross-validation can also be employed to estimate the number of calibration latent variables.<sup>8</sup>  
 96

#### 97 *N-PLS/RBL and U-PLS/RBL*

98 If unexpected constituents occur in a test sample, neither the U-PLS nor N-PLS scores for the  
 99 latter sample can be used for analyte prediction using the trained model. In this case, it is necessary to  
 100 resort to a technique which is able to: (1) detect the new sample as an outlier, indicating that further  
 101 actions are necessary before prediction, and (2) isolate the contribution of the unexpected component  
 102 from that of the calibrated analytes, in order to recalculate appropriate scores for the test sample. U-  
 103 PLS and N-PLS will consider a sample as an outlier if the residuals of the test data reconstruction ( $s_p$ )  
 104 are abnormally large in comparison with the typical instrumental noise.

$$105 \quad s_p = \|\mathbf{e}_p\| / (JK-A)^{1/2} = \|\text{vec}(\mathbf{X}_u) - \mathbf{P} (\mathbf{W}^T \mathbf{P})^{-1} \mathbf{W}^T \text{vec}(\mathbf{X}_u)\| / (JK-A)^{1/2} =$$

$$106 \quad = \|\text{vec}(\mathbf{X}_u) - \mathbf{P} \mathbf{t}_u\| / (JK-A)^{1/2} \quad (8)$$

107  $\|\cdot\|$  indicates the Euclidean norm

108 In such a case, residual bilinearization can be employed to model the presence of unexpected  
 109 sample components using principal component analysis (PCA) or singular value decomposition (SVD),  
 110 which allows one to estimate profiles for the unexpected components in the three data dimensions.<sup>7</sup>

111 For a single unexpected component the expression is :

$$112 \quad \text{vec}(\mathbf{X}_u) = \mathbf{P} \mathbf{t}_u + \text{vec}[\mathbf{g}_{\text{unx}} \mathbf{b}_{\text{unx}} (\mathbf{c}_{\text{unx}})^T] + \mathbf{e}_u \quad (9)$$

113 Where  $\mathbf{b}_{\text{unx}}$  and  $\mathbf{c}_{\text{unx}}$  are the left and right eigenvectors of  $\mathbf{E}_p$  and  $g_{\text{unx}}$  is a scaling factor  
 114 appropriate for SVD analysis:

$$115 \quad (\mathbf{g}_{\text{unx}}, \mathbf{b}_{\text{unx}}, \mathbf{c}_{\text{unx}}) = \text{SVD}_1(\mathbf{E}_p) \quad (10)$$

116 where  $\mathbf{E}_p$  is the  $J \times K$  matrix obtained after reshaping the  $JK \times 1$   $\mathbf{e}_p$  vector of eq (8) and  $\text{SVD}_1$   
 117 indicates taking the first principal component.

118 The RBL procedure consists in keeping constant the matrix of calibration loadings ( $\mathbf{P}$ ), and  
 119 varying the test sample scores ( $\mathbf{t}_u$ ) until the norm of the residual vector  $\|\mathbf{e}_u\|$  is minimized in eq (9)  
 120 using a Gauss-Newton procedure, so that a final value of  $\mathbf{t}_u$  vector is obtained and applied for  
 121 calculating the analyte concentration using eq.(8). So, the number of unexpected components ( $N_{\text{unx}}$ ) can  
 122 be determined by comparing the final residuals  $\mathbf{su}$  with the instrumental noise level, with  $\mathbf{su}$  given by:

$$123 \quad S_u = \frac{\|\mathbf{e}_u\|}{[JK - (A + N_{\text{uns}})]^{1/2}} \quad (11)$$

124 where  $\mathbf{e}_u$  is calculated from Eq. (9). Typically, a plot of  $s_u$  computed for trial values of  
 125  $N_{\text{unx}}$  will show decreasing values, starting at  $s_p$  when  $N_{\text{unx}} = 0$ , until it stabilizes at a value compatible  
 126 with the experimental noise, allowing to locate the correct number of unexpected components.<sup>7,9</sup>  
 127 However, some reports that have been recently published in scientific literature suggest that the number  
 128 of unexpected components could be determined by compare value of the property of interest (sugar  
 129 concentration in the present case) with those obtained applying a referente method.<sup>10</sup>

130 Once the RBL step is finished, and the correct test sample scores have been found, they are  
 131 employed to provide the analyte concentration as is regularly done in all PLS models.

132

133

## **PLS/RBL-LD**

However, this classical RBL procedure is not appropriate when the unexpected components have profiles that are identical to the analyte profile in one of the data dimensions.<sup>11,12</sup>

In these cases a new RBL procedure for linear dependency (RBL-LD) is proposed. The underlying idea is similar to that of the classical RBL method: to minimize the norm of the residual vector  $\mathbf{e}_u$ , computed by fitting the test data to the sum of the relevant contributions (i.e., the part that is modeled by the current calibration and the contribution from the interfering agents) but taking into account the identical profiles in one of the data dimensions. This can be done either by modeling the residuals with MCR-ALS or with PARAFAC with linear dependency (PARALIND) instead of using SVD or PCA.<sup>12</sup>

## **Software**

All routines employed to carry out the calculations described in this paper were written in MATLAB 7.0.<sup>14</sup> A Second-order multivariate calibration toolbox January 2013. For assistance read the document 'mvc2\_gui\_manual.pdf' and Chemom. Intell. Lab. Syst. 96 (2009) 246 -251<sup>15</sup> as well as an MCR-ALS Multivariate curve resolution- alternating least-squares written by Alejandro Olivieri Department of Analytical Chemistry University of Rosario Argentina were used in the present work. Moreover, the N-PLS code is available on the internet at <http://www.models.life.ku.dk/source/> PLS/RBL is available from the authors on request, including a useful graphical user interface for data input and parameter setting, of the type already described for first-order multivariate calibration<sup>22, 29, 56</sup>, and which also works for PARAFAC.

U-PLS/RBL is available at [www.chemometry.com](http://www.chemometry.com), including a graphical user interface.<sup>6,7, 15</sup>

MCR-ALS was implemented using the graphical interface provided by Prof. Romá Tauler in his web page <http://www.ub.edu/mcr/welcome.html>.<sup>16</sup>

### 158 3.4 Figures of merit

159 Figures of merit such as sensitivity (SEN), analytical sensitivity ( $\gamma_n$ ) and limit of detection  
160 (LOD<sub>n</sub>) are regularly employed for method comparison.

161 **MCR-ALS:** Sensitivity can be calculated as:

$$162 \quad SEN = S_n \left\{ \frac{1}{\delta_n} \left[ Z_{cal}^T (I - Z_{unk} Z_{unk}^+) Z_{cal} \right]^{-1} \delta_n \right\}^{-\frac{1}{2}}$$

163 Being:  $S_n$  the slope of MCR-ALS pseudo-univariate plot divided by the number of data point  
164 in each individual data matrix in the augmented mode,  $\delta_n$  column vector (size  $N_{cal} \times 1$ ) where  $N_{cal}$  is  
165 the number of MCR-ALS components present in the calibration set,  $Z_{cal}$  profiles in the nonaugmented  
166 data mode for the components present in the calibration set,  $Z_{unk}$  profiles in the nonaugmented data  
167 mode for the unexpected sample components present in the tests samples.<sup>7</sup> Limit of detection and  
168 quantitation can be computed using the traditional univariate approach.<sup>17</sup>

169

### 170 U-PLS and N-PLS

171 Sensitivity can be calculated in cases when the second order advantage operates as follows:

$$172 \quad SEN = S_n \left\{ \left( B_{sus}^T P_{b,uns} B_{sus} \right) \left( C_{sus}^T P_{c,uns} C_{sus} \right) \right\}^{-1/2}$$

173

174 where SEN is the sensitivity for component n,  $S_n$  is the integrated total signal for component n at  
175 unit concentration,  $B_{sus}$  and  $C_{sus}$  are the matrices containing the profiles for all suspected components  
176 (i.e., those present in the training set of samples) in each data dimension, 'nn' implies selecting the

177 (n,n) element corresponding to the n<sup>th</sup>. analyte of interest, ‘\*’ implies the Hadamard matrix product,  
 178 and the projection matrices  $\mathbf{P}_{b,uns}$  and  $\mathbf{P}_{c,uns}$  are given by:

$$179 \quad \mathbf{P}_{b,uns} = \mathbf{I} - \mathbf{B}_{uns} \mathbf{B}_{u+ns}^T$$

$$180 \quad \mathbf{P}_{c,uns} = \mathbf{I} - \mathbf{C}_{uns} \mathbf{C}_{u+ns}^T$$

181 where  $\mathbf{B}_{uns}$  and  $\mathbf{C}_{uns}$  contain the profiles for the unsuspected components as columns.

182 Notice that when the second-order advantage is employed, this equation implies that SEN for  
 183 component n is sample-specific and cannot be defined for the multivariate method as a whole. In such  
 184 cases an average value for a set of samples can be estimated and reported.<sup>18</sup>

185 In the case of PLS/RBL, the appropriate expression for the estimation of sensitivity is :<sup>7, 18</sup>

$$186 \quad SEN_n = 1 / \| (\mathbf{P}_{eff}^+)^T \mathbf{v} \|$$

187 where  $\mathbf{v}$  is the ( $A \times 1$ ) latent vector of regression coefficients for the PLS model, and  $\mathbf{P}_{eff}$  is a  
 188 matrix given by:

189

$$190 \quad \mathbf{P}_{eff} = (\mathbf{P}_{c,uns} \otimes \mathbf{P}_{b,uns})^T \mathbf{P}$$

191 where  $\mathbf{P}$  is the ( $JK \times A$ ) loading matrix provided by the PLS model,  $\mathbf{P}_{c,uns}$  and  $\mathbf{P}_{b,uns}$  have the  
 192 same meaning as above, and  $\otimes$  implies the Kronecker product.

193 More useful than SEN seems to be the analytical sensitivity  $\gamma_n$ , defined, in analogy with  
 194 univariate calibration, as the quotient between SEN and the instrumental noise level. Its inverse  
 195 establishes the minimum difference of concentration which can be appreciated across the lineal range,  
 196 and is independent on instrument or scale.<sup>7</sup> So that, the analytical sensitivity is suitable for comparing  
 197 analytical methods based on different response nature.

198 Moreover, the limit of detection (LOD) can be calculated as a interval obtaining the lower and  
 199 an upper limits of it , propopsed by Olivieri et al . in a recently publication<sup>19</sup>

$$200 \quad \text{LOD}_{\min} = 3.3 [\text{SEN}^{-2} \text{var}(x) + h_{0\min} \text{SEN}^{-2} \text{var}(x) + h_{0\min} \text{var}(y_{\text{cal}})]^{1/2}$$

$$201 \quad \text{LOD}_{\max} = 3.3 [\text{SEN}^{-2} \text{var}(x) + h_{0\max} \text{SEN}^{-2} \text{var}(x) + h_{0\max} \text{var}(y_{\text{cal}})]^{1/2}$$

$$202 \quad \text{Being, } h_{0\min} = \frac{\bar{y}_{\text{cal}}^2}{\sum_{i=1}^I y_i^2} \quad \text{where } y_i \text{ is the centered concentration for the } i\text{th calibration sample ,}$$

203 meanwhile the upper limit can be estimated as  $h_{0\max} = \max(h_{0\text{cal}})$ , in which

$$204 \quad h_{0\text{cal}} = h_{\text{cal}} + h_{0\min} \left[ 1 - \left( \frac{y_{\text{cal}}}{\bar{y}_{\text{cal}}} \right)^2 \right] \quad \text{where } h_{\text{cal}} \text{ and } y_{\text{cal}} \text{ are the leverage and (centered) analyte concentration}$$

205 of a generic calibration sample.  $\text{LOD}_{\min}$  and  $\text{LOD}_{\max}$  depend on the leverage, which is a function of the  
 206 calibration score matrix  $\mathbf{T}$  so that the limits of the LOD will depend on the calibration design and the  
 207 number of calibration latent variables.<sup>19</sup>

209

## 210 References

- 211 [1] A.Espinosa-Mansilla , A.Muñoz de la Peña , H.C. Goicoechea , A.C. Olivieri A. C., “Two  
212 multivariate strategies applied to three-way kinetic spectrophotometric data for the determination of  
213 mixtures of the pesticides carbaryl and chlorpyrifos”. *Appl. Spectrosc.*, 58 (2004) 83-90.
- 214 [2] M. De Luca , G. Ragno, G. Ioele, R. Tauler “Multivariate curve resolution of incomplete fused  
215 multiset data from chromatographic and spectrophotometric analyses for drug photostability studies”.  
216 *Anal. Chim. Acta*, 837 (2014) 31–37.
- 217 [3] P. Henrique Marçó, R. J. Poppi , I. S. Scarminio, R. Tauler “Investigation of the pH effect and UV  
218 radiation on kinetic degradation of anthocyanin mixtures extracted from *Hibiscus acetosella*” *Food*  
219 *Chem.*, 125 (2011) 1020–1027
- 220 [4] R.Tauler, “Multivariate curve resolution applied to second order data”. *Chemom. Intell. Lab. Syst.*,  
221 30 (1995) 133–146.
- 222 [5] R.Tauler “Comments on a recently published paper ‘some surprising properties of multivariate  
223 curve resolution-alternating least squares (MCR-ALS) algorithms”*J. Chemom.*, 24 (2010) 87-90.
- 224 [6] G.M.Escandar, H.C. Goicoechea, A.Muñoz De La Peña, A.C. Olivieri, “Second- and higher-order  
225 data generation and calibration: A tutorial”. *Anal. Chim. Acta.*, 806 (2014) 8 – 26.
- 226 [7] A.Olivieri, G.Escandar, “Practical Three way calibration”. Ed. Elsevier Inc, UK (2014)
- 227 [8] D.M. Haaland, E.V. Thomas, “Partial least-squares methods for spectral analyses. 1. Relation to  
228 other quantitative calibration methods and the extraction of qualitative information *Anal. Chem.*, 60  
229 (1988) 1193–1202
- 230 [9] M.D.Gil García, M.J.Culzoni, M.M. De Zan, R.Santiago Valverde., M.Martínez Galera.,  
231 H.C.Goicoechea, “Solving matrix effects exploiting the second-order advantage in the resolution and  
232 determination of eight tetracycline antibiotics in effluent wastewater by modelling liquid

233 chromatography data with multivariate curve resolution-alternating least squares and unfolded-partial  
 234 least squares followed by residual bilinearization algorithms: II. Prediction and figures of merit” *J*  
 235 *Chromatogr A.*, 1179 (2008) 106-124.

236 [10] J.W.Batista Braga , R.L. Carneiro , R.J Poppi . “Evaluation of the number of factors needed  
 237 for residual bilinearization in BLS and UPLS models to achieve the second-order  
 238 advantage”. *Chemomr. Intell. Lab. Syst.*, 100 (2010) 99-109.

239 [11] M.J.Culzoni, H.C.Goicoechea, G.A. Ibañez, V.A. Lozano, N.R. Marsili, A.C. Olivieri, A.P.  
 240 Pagani, “Second-order advantage from kinetic-spectroscopic data matrices in the presence of extreme  
 241 spectral overlapping”. *Anal. Chim. Acta*, 614 (2008) 46–57.

242 [12] V.A. Lozano, G.A. Ibañez, A.C.Olivieri, “ Second-Order Analyte Quantitation under Identical  
 243 Profiles in One Data Dimension. A Dependency-Adapted Partial Least-Squares/Residual  
 244 Bilinearization Method”. *Anal. Chem.*, 82 (2010) 4510-4519.

245 [13] R. Bro, R. Harshman, N. D. Sidiropoulos. “Modeling multi-way data with linearly dependent  
 246 loadings”. *J.Chemom.*, 23 (2009) 324-340

247 [14] MATLAB 7.0, The Mathworks, Natick, Massachussets, USA, 2007]

248 [15] A. C. Olivieri , H-L Wu, R-Q. Yu, “MVC2: A MATLAB graphical interface toolbox for second-  
 249 order multivariate calibration”. *Chemom. Intell. Lab.Syst.*, 96 (2009) 246-251.

250 [16] J. Jaumot, R. Gargallo, A. de Juan, R. Tauler, “An user friendly interface for MCR-ALS : a new  
 251 tool for Multivariate Curve Resolution in MATLAB”. *Chemom. Intell. Lab. Syst.*, 76 (2005) 101-110

252 [17] J.Saurina, C.Leal, R.Compañó, M.Granados, M.Dolors Prat, R.Tauler, ”Estimation of figures of  
 253 merit using univariate statisticsfor quantitative second order multivariate curve resolution”.  
 254 *Anal.Chim.Acta*, 432 (2001) 241-251

255 [18] A.C.Olivieri, “Analytical figures of merit from univariate to multivariate calibration “. *Chem.Rev.*,  
 256 114(2014)5358-5378

257 [19] F.Allegrini , A.C. Olivieri , “IUPAC-Consistent Approach to the Limit of Detection in Partial  
258 Least- Squares Calibration”, *Anal. Chem.* 86 (2014) 7858–7866.

259

260

261

262

263

264

265

266

267

268
