# Supplementary material for: Determination of reducing sugars in foodstuff applying multivariate second-order calibration
Source: Royal Society of Chemistry journal article supplement (doi:10.1039/c6ay00964f), 2016-01-01
Supplement: c6ay00964f5.pdf [file c6ay00964f5.pdf]

**Table 1s** Sugars prediction in presence of different colourants applying MCR-ALS

| <b>DYE</b>    | <b>Nominal concentration</b><br><b>mg L<sup>-1</sup></b> |             | <b>Predicted concentration</b><br><b>MCR-ALS *</b><br><b>mg L<sup>-1</sup></b> |              |            |             |
|---------------|----------------------------------------------------------|-------------|--------------------------------------------------------------------------------|--------------|------------|-------------|
|               | <b>GLU</b>                                               | <b>FRU</b>  | <b>GLU</b>                                                                     | <b>Rec %</b> | <b>FRU</b> | <b>Rec%</b> |
| Amaranth      | <b>20.0</b>                                              | <b>20.0</b> | 22.1 (2)                                                                       | 110          | 21.6 (1)   | 108         |
| Ponceau Red   | <b>20.0</b>                                              | <b>20.0</b> | 21.2 (4)                                                                       | 106          | 22.0 (1)   | 110         |
| Patent Blue   | <b>20.0</b>                                              | <b>20.0</b> | 17.8(2)                                                                        | 89           | 19.9 (2)   | 99          |
| Sunset yellow | <b>20.0</b>                                              | <b>20.0</b> | 18.1 (3)                                                                       | 90           | 18.9 (1)   | 95          |
| Tartrazine    | <b>20.0</b>                                              | <b>20.0</b> | 20.0 (2)                                                                       | 100          | 19.8(2)    | 99          |

\*Average of three determinations. Standard deviation in parenthesis
