# Supplementary material for: Determination of reducing sugars in foodstuff applying multivariate second-order calibration
Source: Royal Society of Chemistry journal article supplement (doi:10.1039/c6ay00964f), 2016-01-01
Supplement: c6ay00964f6.pdf [file c6ay00964f6.pdf]

**Table 2s.** Predictions of sugars in presence of additional components, usually present in food, able to reduce HCF.

|          | <i>Nominal concentration</i><br><i>mg L<sup>-1</sup></i> |             |             | <i>Predicted concentration</i><br><i>MCR-ALS</i> |             |
|----------|----------------------------------------------------------|-------------|-------------|--------------------------------------------------|-------------|
|          | <i>FRU</i>                                               | <i>XYL</i>  | <i>MAL</i>  | <i>mg L<sup>-1</sup></i>                         | <i>REC%</i> |
| <b>A</b> | <b>20.0</b>                                              | <b>20.0</b> | <b>0.0</b>  | 19.6(8)                                          | 98          |
| <b>B</b> | <b>20.0</b>                                              | <b>0.0</b>  | <b>20.0</b> | 21.0(8)                                          | 105         |
|          | <b>GLU</b>                                               | <b>XYL</b>  | <b>MAL</b>  |                                                  |             |
|          | <b>20.0</b>                                              | <b>20.0</b> | <b>0.0</b>  | 20.2(3)                                          | 101         |
| <b>A</b> |                                                          |             |             |                                                  |             |
| <b>B</b> | <b>20.0</b>                                              | <b>0.0</b>  | <b>20.0</b> | 21.2 (2)                                         | 106         |

\* Average of three determination. Standard deviation in parenthesis.
